# Supplementary material for: p53 Activity Dominates That of p73 upon Mdm4 Loss in Development and Tumorigenesis
Source: Oxford University Press journal article supplement (doi:10.1158/1541-7786.mcr-15-0346), 2015-11-02
Supplement: 15417786mcr150346-sup-154116_1_supp_3169922_nvlrx6.docx [file 15417786mcr150346-sup-154116_1_supp_3169922_nvlrx6.docx]

Supplementary Table S1- *p73* is haploinsufficient to rescue the *Mdm4∆2/∆2* *p53+/−* phenotype

Cross: *Mdm4Δ2Δ2 p53*×*Mdm4Δ2 p73*

| Genotype | Number of E11.5 embryos | | Percentage of embryos | |
| --- | --- | --- | --- | --- |
| Observed | Expected | Observed | Expected |
| *Mdm4Δ2 p53 p73* | 5 | 2.5 | 50 | 25 |
| *Mdm4Δ2 p53 p73* | 5 | 2.5 | 50 | 25 |
| *Mdm4Δ2Δ2 p53 p73* | 0§ | 2.5 | 0 | 25 |
| *Mdm4Δ2Δ2 p53 p73* | 0§ | 2.5 | 0 | 25 |
| Total | 10¶ | 10 | 100 | 100 |

§At E11.5, nine *Mdm4Δ2Δ2 p53 p73*and 8 *Mdm4Δ2Δ2 p53 p73*runted embryos were observed. All *Mdm4Δ2Δ2 p53* embryos, regardless of *p73* genotype, were comparable morphologically.

¶ Eight empty decidua were also collected.
